# Supplementary material for: Methane emissions from an oil sands tailings pond: a quantitative comparison of fluxes derived by different methods
Source: Copernicus journal article supplement (doi:10.5194/amt-14-1879-2021), 2021-03-08
Supplement: Supplementary file 1 [file amt-14-1879-2021-supplement.pdf]

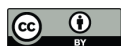

## *Supplement of*

# **Methane emissions from an oil sands tailings pond: a quantitative comparison of fluxes derived by different methods**

**Yuan You et al.**

*Correspondence to:* Ralf Staebler ([ralf.staebler@canada.ca](mailto:ralf.staebler@canada.ca))

The copyright of individual parts of the supplement might differ from the CC BY 4.0 License.

## Supplemental Figures

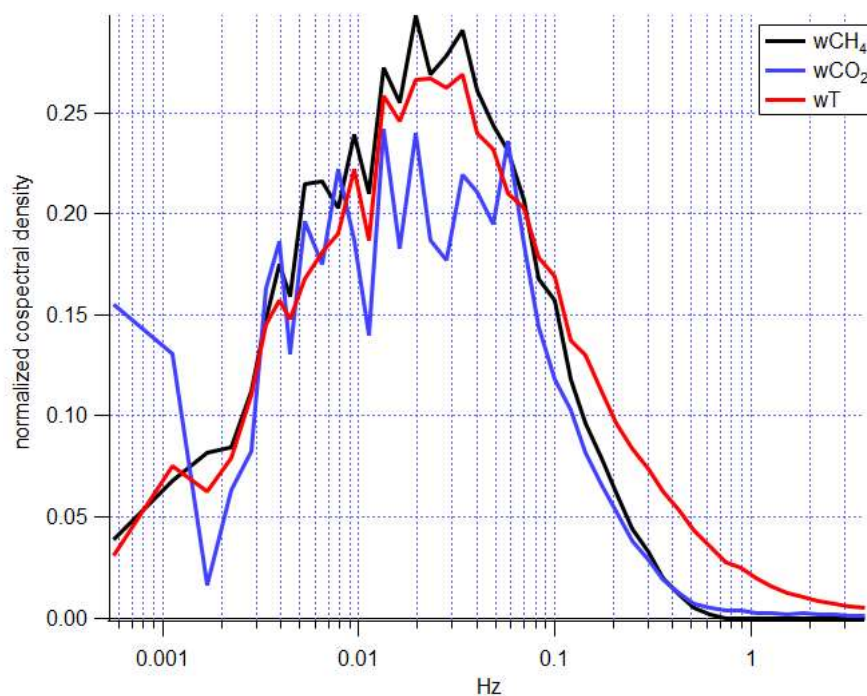

**Figure S1** Average normalized cospectral densities for CH<sub>4</sub>, CO<sub>2</sub> and sensible heat for those periods when the wind was from the pond and the data quality flag for the CH<sub>4</sub> flux was 0 or 1.

5

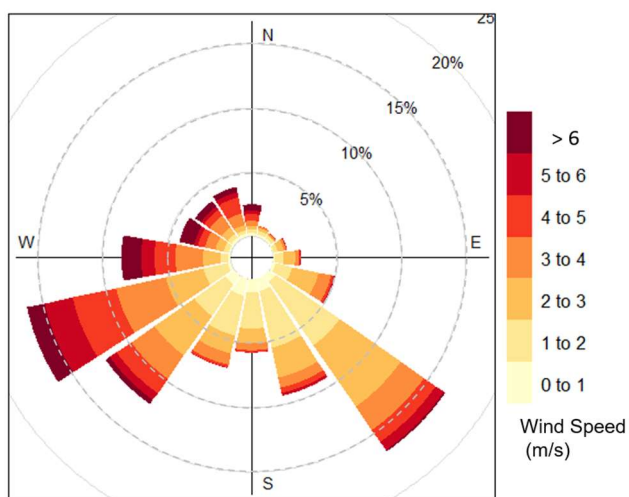

**Figure S2** The wind rose for the entire measurement period. The color labels the wind speed (m/s). The radius represents the frequency of the wind in each direction bin.

10

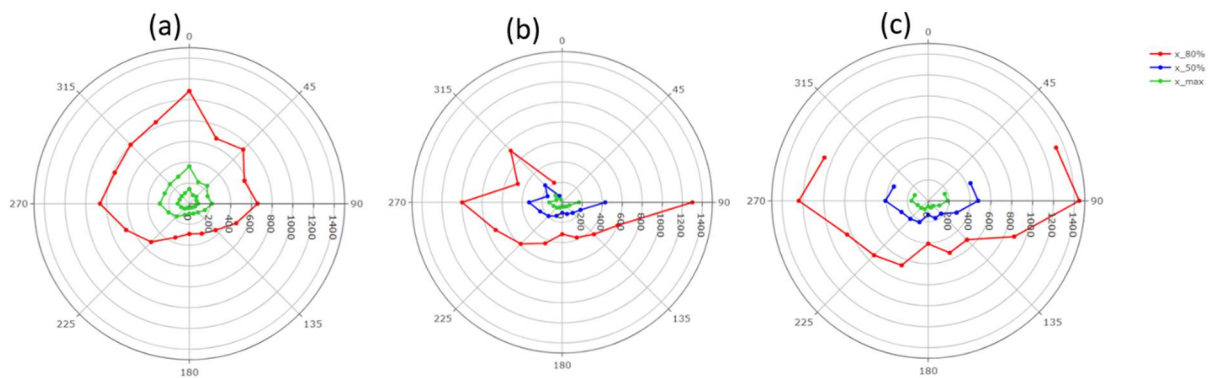

Figure S3 Polar plots show the footprints under unstable (a), neutral (b), and stable (c) conditions. The red and blue traces in the polar plots show the medians of 80% and 50% contribution distances (in meters) for the measured half-hour periods EC fluxes in 16 wind direction bins. The green traces show the medians of contribution distances with the footprint peak. Angles in the polar plot are the wind direction ( $0^\circ$  = true North) with the center at the main site.

15

20

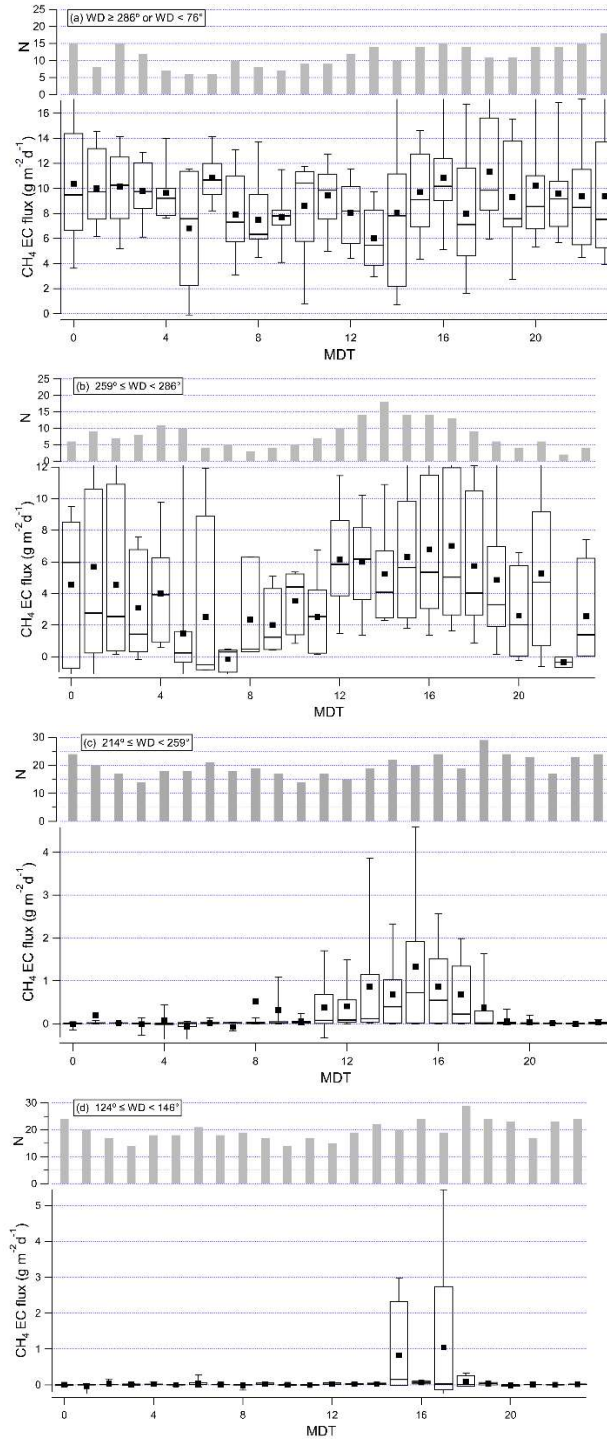

25 Figure S4 Diurnal variation of  $\text{CH}_4$  EC flux (bottom) and number ( $N$ ) of half-hours in each hour bin (top). (a) Wind direction (WD)  $\geq 286^\circ$ , or WD  $\leq 76^\circ$ , pond; (b)  $259^\circ \leq \text{WD} < 286^\circ$ , pond + shore of pond; (c)  $214^\circ \leq \text{WD} < 259^\circ$ , trees + a lake; (d)  $124^\circ \leq \text{WD} < 146^\circ$ , worker's log and parking lots. MDT = Mountain Daylight Savings Time. Lower and upper bounds of the box are 25<sup>th</sup> and 75<sup>th</sup> percentile of each bin; the lines in the box and the black squares mark the median and mean of data in each bin; whiskers are 10<sup>th</sup> and 90<sup>th</sup> percentile of data.

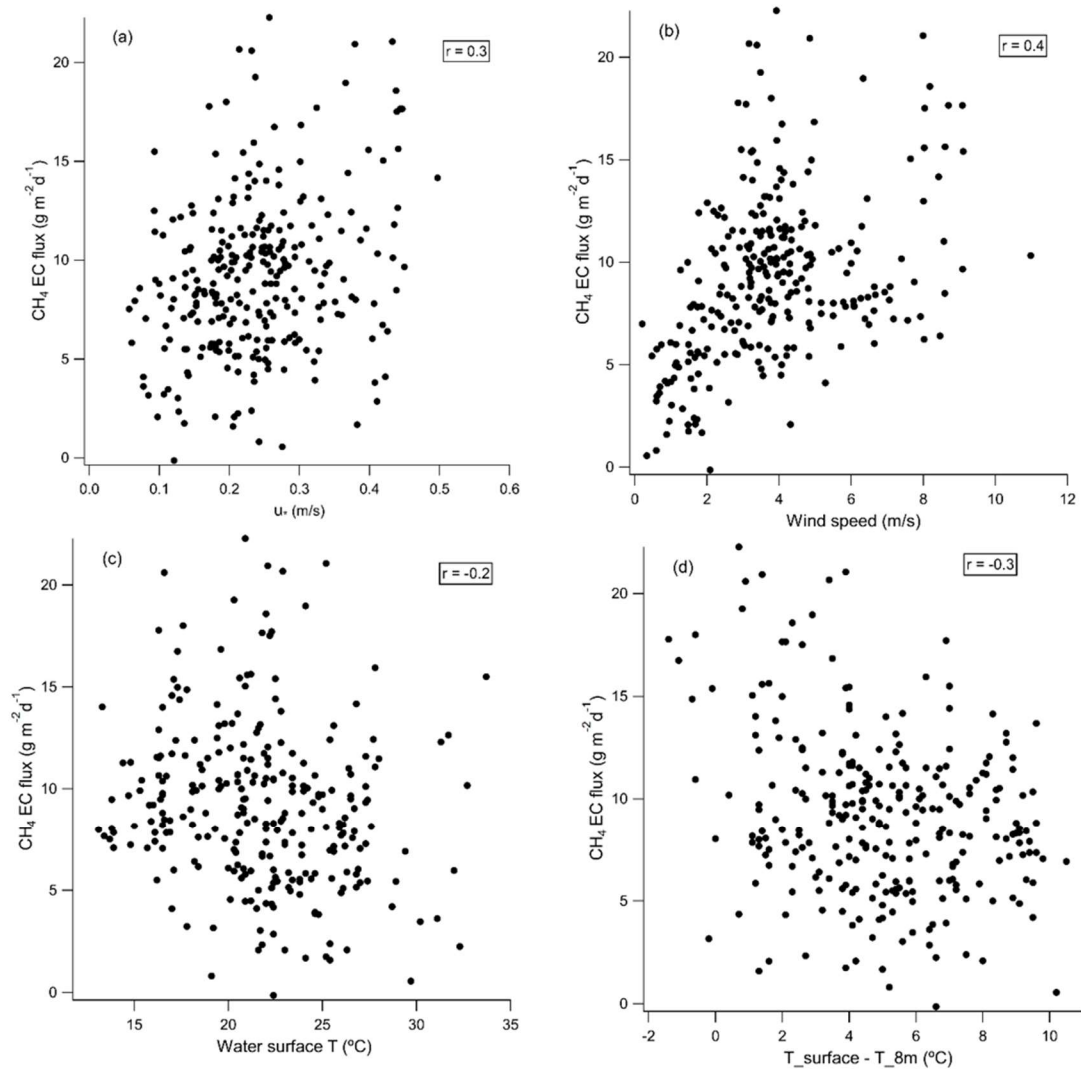

Figure S5  $\text{CH}_4$  EC flux when the wind came from the pond direction as a function of (a)  $u_*$ ; (b) wind speed; (c) water surface temperature; (d) temperature difference between water surface and 8 m.  $r$  in each panel labels the correlation coefficient of the least square fit in linear regression analysis.

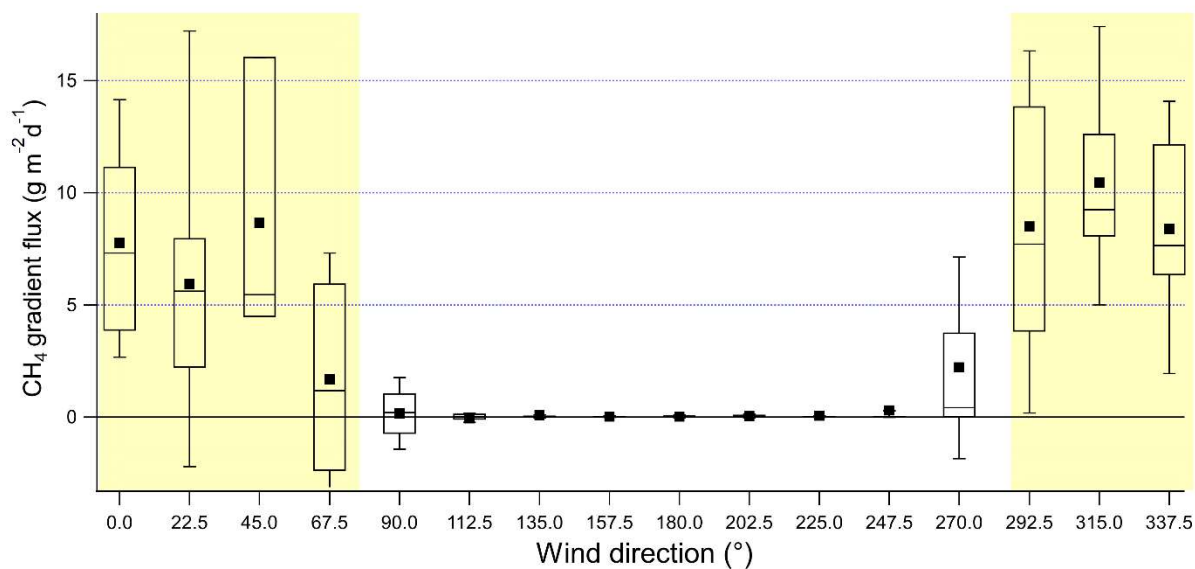

40 Figure S6 Gradient flux of CH<sub>4</sub> as a function of wind direction, yellow shades indicate wind directions from the pond. . Lower and upper bounds of the box plot are 25<sup>th</sup> and 75<sup>th</sup> percentile; the line in the box marks the median and the black square labels the mean; the whiskers label the 10<sup>th</sup> and 90<sup>th</sup> percentile. Yellow shades indicate the wind directions from the pond.

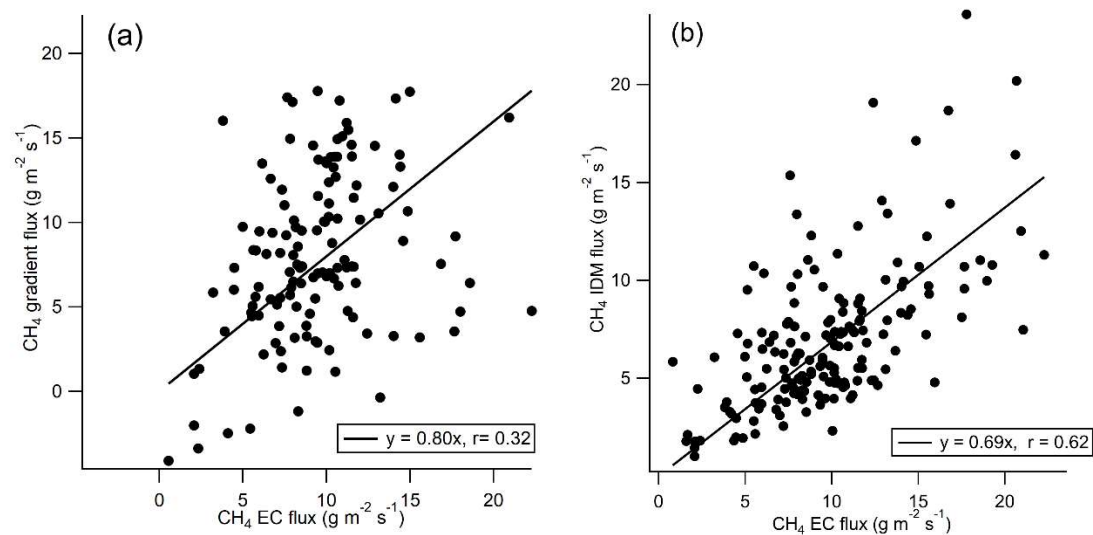

Figure S7 (a) CH<sub>4</sub> gradient flux, and (b) CH<sub>4</sub> IDM flux compared with EC flux, when the wind was from the pond direction.

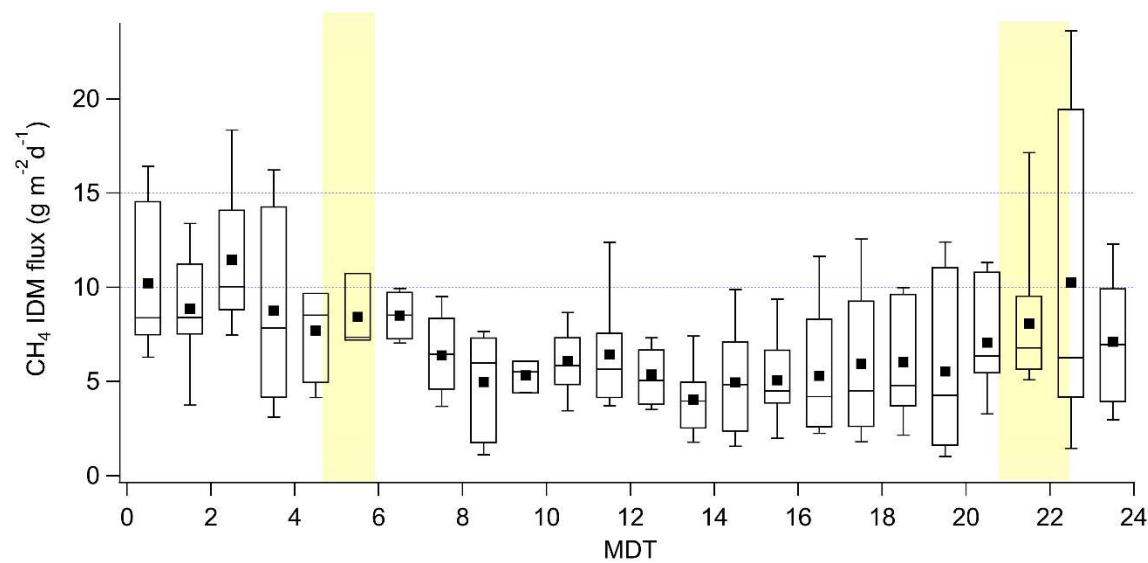

Figure S8 Diurnal variation of IDM flux. MDT = Mountain Daylight Savings Time. Lower and upper bounds of the box plot are 25<sup>th</sup> and 75<sup>th</sup> percentile; the line in the box marks the median and the black square labels the mean; the whiskers label the 10<sup>th</sup> and 90<sup>th</sup> percentile. The yellow shades mark the range of local sunrise and sunset time during this 5-week project.

## Supplemental Table

Table S1 CH<sub>4</sub> gradient flux (g m<sup>-2</sup> d<sup>-1</sup>) results with two approaches for calculating  $S_c$ .

| (g m <sup>-2</sup> d <sup>-1</sup> ) | Q_25% | median | Q_75% | mean <sup>a</sup> |
|--------------------------------------|-------|--------|-------|-------------------|
| Variable $S_c$                       | 3.8   | 6.1    | 11.0  | 7.2 ± 3.5         |
| Constant $S_c$                       | 1.3   | 4.0    | 8.2   | 4.8 ± 2.4         |

<sup>a</sup> Errors with the mean fluxes are calculated with a “top-down” error estimation approach, using the average of standard deviations of fluxes from five periods when the fluxes displayed high stationarity.
